# Supplementary material for: Generalizability of the NAMI Family-to-Family Education Program: Evidence From an Efficacy Study
Source: Atypon-hosted journal article supplement (doi:10.1176/appi.ps.201500519), 2016-02-14
Supplement: appi.ps.201500519.ds001.pdf [file appi.ps.201500519.ds001.pdf]

Table 1. Results of Pre- and Post-assessments Differences by Measure

| Measure                                                               | Range               | Pre   |      | Post  |      | Test          |    |       | Effect size |
|-----------------------------------------------------------------------|---------------------|-------|------|-------|------|---------------|----|-------|-------------|
|                                                                       |                     | M     | SD   | M     | SD   | Statistic (t) | df | p     |             |
| <b>Caregiver problem-focused coping</b>                               |                     |       |      |       |      |               |    |       |             |
| Family Empowerment Scale: Family subscale (12 items)                  | 1-5 <sup>a</sup>    | 3.81  | 0.45 | 4.33  | 0.41 | -8.67         | 65 | <.001 | 1.07        |
| <b>Caregiver subjective burden</b>                                    |                     |       |      |       |      |               |    |       |             |
| Family Experiences Interview Schedule: Displeasure subscale (8 items) | 1-4 <sup>b, c</sup> | 2.21  | 0.68 | 1.85  | 0.58 | 4.93          | 71 | <.001 | -0.58       |
| <b>Family system functioning</b>                                      |                     |       |      |       |      |               |    |       |             |
| Family Assessment Device: General functioning scale (12 items)        | 12-48 <sup>b</sup>  | 28.65 | 6.71 | 26.88 | 6.35 | 3.10          | 71 | 0.003 | -0.37       |
| <b>Caregiver emotion-focused coping</b>                               |                     |       |      |       |      |               |    |       |             |
| Brief COPE Inventory: Positive reframing subscale (2 items)           | 0-6 <sup>a</sup>    | 3.88  | 1.67 | 4.87  | 1.28 | -5.16         | 68 | <.001 | 0.62        |
| Acceptance subscale (2 items)                                         | 0-6 <sup>a</sup>    | 4.56  | 1.51 | 5.36  | 0.94 | -4.62         | 76 | <.001 | 0.53        |
| Emotional support subscale (2 items)                                  | 0-6 <sup>a</sup>    | 3.96  | 1.63 | 4.63  | 1.35 | -3.37         | 77 | 0.001 | 0.38        |
| <b>Self-care</b>                                                      |                     |       |      |       |      |               |    |       |             |
| Self -Care Inventory (7 items)                                        | 0-28 <sup>a</sup>   | 21.76 | 3.70 | 23.73 | 3.32 | -5.26         | 78 | <.001 | 0.59        |
| <b>Knowledge</b>                                                      |                     |       |      |       |      |               |    |       |             |
| NAMI NYC Knowledge Scale (4 items)                                    | 1-4 <sup>a</sup>    | 2.78  | 0.58 | 3.38  | 0.50 | -8.48         | 77 | <.001 | 0.96        |

<sup>a</sup> Higher scores indicate better outcomes (more empowerment and knowledge, better self-care and coping)

<sup>b</sup> Higher scores indicate poor outcomes (more worry, poor functioning)

<sup>c</sup> Dixon et al. 2011 used a 5 point scale

NOTE: the emotion-focused coping, self-care and knowledge measures were different from the Dixon et al. (2011) randomized control trial study.
